# Supplementary material for: Macrophage morphology correlates with single-cell diversity and prognosis in colorectal liver metastasis
Source: PubMed Central journal article supplement — J Exp Med. 2020 Aug 12;217(11):e20191847. doi: 10.1084/jem.20191847 (PMC7596819; doi:10.1084/jem.20191847), 2020-08-12
Supplement: JEM_20191847_TableS2.pdf [file JEM_20191847_TableS2.pdf]

**High-throughput sequencing metadata template (version 2.1).**  
**All fields in this template must be completed.**  
**Templates containing example data are found in the METADATA EXAMPLES spreadsheet tabs at the foot of this page.**  
**Field names (in blue on this page) should not be edited. Hover over cells containing field names to view field content guidelines.**  
**Human data. If there are patient privacy concerns regarding making data fully public through GEO, please submit to NCBI's dbGaP (<http://www.ncbi.nlm.nih.gov/gap>) database. dbGaP has controlled access mechanisms and is an appropriate resource for hosting sensitive patient data.**

**SERIES**

# This section describes the overall experiment.

**title** Gene expression profile of tumor-associated macrophages according to morphological features in human colorectal liver metastasis (CLM)

The immune landscape impacts outcome and therapeutic response in many tumor types, including colorectal liver metastases (CLM). It has long been known that in vitro polarized macrophages differ in morphology. Here we tested the hypothesis that morphology of tumor-associated macrophages (TAMs) in CLM represents a correlate of function with prognostic significance. Density and morphological metrics (area and perimeter) of TAMs were measured and correlated with clinic-pathological prognostic variables. While density of TAMs did not correlate with survival of CLM patients, cell area identified small and large macrophages that associated with 5-year disease-free survival rate of 27.8% and 0.2% respectively (P<0.001). RNA sequencing of morphologically distinct macrophages identified LXR/RXR as the most enriched pathway in large macrophages and upregulation of genes involved in cholesterol metabolism, phagocytosis and downregulation of the inflammatory program. These results support that accurate, morphometric characterization can serve as a simple readout of TAM diversity with prognostic significance.

**overall design contributor** Roberta Carraro  
**contributor** Federica Marchesi  
**contributor** Nina Cortese  
**contributor** Matteo Donatoni  
**contributor** Alberto Mantovani  
**supplementary file**  
**SRA\_center\_name\_code** [optional]

**SAMPLES**

# This section lists and describes each of the biological Samples under investigation, as well as any protocols that are specific to individual Samples.

| Sample name | title                 | source name   | organism     | characteristics: tumor      | molecule | processed data file              | processed data file              | raw file                          | raw file                          |
|-------------|-----------------------|---------------|--------------|-----------------------------|----------|----------------------------------|----------------------------------|-----------------------------------|-----------------------------------|
| Sample 1    | P8_large_Macrophages  | Human sapiens | Homo sapiens | Colorectal liver metastasis | mRNA     | P8_large_Macrophages_Forward bw  | P8_large_Macrophages_Reverse bw  | P8_large_Macrophages_R1.fastq.gz  | P8_large_Macrophages_R2.fastq.gz  |
| Sample 2    | P8_small_Macrophages  | Human sapiens | Homo sapiens | Colorectal liver metastasis | mRNA     | P8_small_Macrophages_Forward bw  | P8_small_Macrophages_Reverse bw  | P8_small_Macrophages_R1.fastq.gz  | P8_small_Macrophages_R2.fastq.gz  |
| Sample 3    | P9_large_Macrophages  | Human sapiens | Homo sapiens | Colorectal liver metastasis | mRNA     | P9_large_Macrophages_Forward bw  | P9_large_Macrophages_Reverse bw  | P9_large_Macrophages_R1.fastq.gz  | P9_large_Macrophages_R2.fastq.gz  |
| Sample 4    | P9_small_Macrophages  | Human sapiens | Homo sapiens | Colorectal liver metastasis | mRNA     | P9_small_Macrophages_Forward bw  | P9_small_Macrophages_Reverse bw  | P9_small_Macrophages_R1.fastq.gz  | P9_small_Macrophages_R2.fastq.gz  |
| Sample 5    | P10_large_Macrophages | Human sapiens | Homo sapiens | Colorectal liver metastasis | mRNA     | P10_large_Macrophages_Forward bw | P10_large_Macrophages_Reverse bw | P10_large_Macrophages_R1.fastq.gz | P10_large_Macrophages_R2.fastq.gz |
| Sample 6    | P10_small_Macrophages | Human sapiens | Homo sapiens | Colorectal liver metastasis | mRNA     | P10_small_Macrophages_Forward bw | P10_small_Macrophages_Reverse bw | P10_small_Macrophages_R1.fastq.gz | P10_small_Macrophages_R2.fastq.gz |
| Sample 7    | P11_large_Macrophages | Human sapiens | Homo sapiens | Colorectal liver metastasis | mRNA     | P11_large_Macrophages_Forward bw | P11_large_Macrophages_Reverse bw | P11_large_Macrophages_R1.fastq.gz | P11_large_Macrophages_R2.fastq.gz |
| Sample 8    | P11_small_Macrophages | Human sapiens | Homo sapiens | Colorectal liver metastasis | mRNA     | P11_small_Macrophages_Forward bw | P11_small_Macrophages_Reverse bw | P11_small_Macrophages_R1.fastq.gz | P11_small_Macrophages_R2.fastq.gz |
| Sample 9    | P12_large_Macrophages | Human sapiens | Homo sapiens | Colorectal liver metastasis | mRNA     | P12_large_Macrophages_Forward bw | P12_large_Macrophages_Reverse bw | P12_large_Macrophages_R1.fastq.gz | P12_large_Macrophages_R2.fastq.gz |
| Sample 10   | P12_small_Macrophages | Human sapiens | Homo sapiens | Colorectal liver metastasis | mRNA     | P12_small_Macrophages_Forward bw | P12_small_Macrophages_Reverse bw | P12_small_Macrophages_R1.fastq.gz | P12_small_Macrophages_R2.fastq.gz |

**PROTOCOLS**

# Any of the protocols below which are applicable to only a subset of Samples should be included as additional columns of the SAMPLES section instead.

**growth protocol**  
**treatment protocol**  
**extract protocol** Total RNA was extracted using the Single Cell RNA Purification Kit (Norgen Biotek), following the manufacturer's recommendations for extraction from low cell numbers.  
**library construction protocol** Libraries were constructed by SMARTer Stranded Total RNA Kit (Clontech) according to manufacturer's instructions.  
**library strategy** Paired-end sequence reads (75-tp in length) were generated on an Illumina NextSeq 500.

**DATA PROCESSING PIPELINE**

# Data processing steps include base-calling, alignment, filtering, peak-calling, generation of normalized abundance measurements etc...  
 # For each step provide a description, as well as software name, version, parameters, if applicable.  
 # Include additional steps, as necessary.  
**data processing step** RNA-seq reads were aligned to the Ensembl GRCh38 genome assembly using STAR (02021) with the following parameters: --outFilterIntronMotifs RemoveNoncanonical --quantMode TranscriptomeSAM GeneCounts.  
**data processing step** Differential expression analysis was performed using the GLM approach implemented in the R/Bioconductor package EdgeR.  
**Ensembl/ Homo Sapiens release** GRCh38  
**processed data files format and content** bigWig were generated using bam2wig.py module in RSeQC v2.5

# For each file listed in the "processed data file" columns of the SAMPLES section, provide additional information below.

| PROCESSED DATA FILES             | file type | file checksum                   |
|----------------------------------|-----------|---------------------------------|
| P8_large_Macrophages_Forward bw  | bigWig    | 84713503ee1446a60eefa5027138585 |
| P8_large_Macrophages_Reverse bw  | bigWig    | 23454c2420204d1f1ce0f8603336    |
| P8_small_Macrophages_Forward bw  | bigWig    | 5727002c3e20a2c272327a7686c4    |
| P8_small_Macrophages_Reverse bw  | bigWig    | 657204024b02f0c229a94ac09b2e26b |
| P9_large_Macrophages_Forward bw  | bigWig    | 60e67001c724c624044c0a0701a9    |
| P9_large_Macrophages_Reverse bw  | bigWig    | 42ee483203c4c48f9f5c447327ba0f  |
| P9_small_Macrophages_Forward bw  | bigWig    | 347acba00097ee6d9a03a05095      |
| P9_small_Macrophages_Reverse bw  | bigWig    | 008c0aa7488a970d979e053eb47552  |
| P10_large_Macrophages_Forward bw | bigWig    | 3263586f142a26071c731815d67796  |
| P10_large_Macrophages_Reverse bw | bigWig    | 28c2716264b61150e0c4ef926271    |
| P10_small_Macrophages_Forward bw | bigWig    | 9e0a55916ea89f16251ce1ee0882550 |
| P10_small_Macrophages_Reverse bw | bigWig    | 4e02695918111802a09486e64e2     |
| P11_large_Macrophages_Forward bw | bigWig    | 856af05c414b2b7ad429f938f9b2e   |
| P11_large_Macrophages_Reverse bw | bigWig    | 16856d869952232903b6fca8738     |
| P11_small_Macrophages_Forward bw | bigWig    | c2b0468ad8e0e201003a033c0ad7    |
| P11_small_Macrophages_Reverse bw | bigWig    | 13a68516521b1611048c92079f6c96  |
| P12_large_Macrophages_Forward bw | bigWig    | 384544717234268c0330b6e4c19     |
| P12_large_Macrophages_Reverse bw | bigWig    | c09842232a20124449604c0e35e38   |
| P12_small_Macrophages_Forward bw | bigWig    | 5a0c2591656978a2cc2c34603a0e87  |
| P12_small_Macrophages_Reverse bw | bigWig    | bb8a2a73cc09f044498571a0af91    |

# For each file listed in the "raw file" columns of the SAMPLES section, provide additional information below.

| RAW FILES                         | file type | file checksum                    | instrument model | read length |
|-----------------------------------|-----------|----------------------------------|------------------|-------------|
| P8_large_Macrophages_R1.fastq.gz  | fastq     | 50e97a096f7186c21316a4944d0d4    | NextSeq500       | 78bp        |
| P8_large_Macrophages_R2.fastq.gz  | fastq     | 6aa03030e1149f7ed3c5302403a3b    | NextSeq500       | 78bp        |
| P8_small_Macrophages_R1.fastq.gz  | fastq     | 780c8009f9da374b14292a89151c2    | NextSeq500       | 78bp        |
| P8_small_Macrophages_R2.fastq.gz  | fastq     | 6c34c7cf24240880e858150a87e6     | NextSeq500       | 78bp        |
| P9_large_Macrophages_R1.fastq.gz  | fastq     | 89502303b9e09e844229f6a3a98f     | NextSeq500       | 78bp        |
| P9_large_Macrophages_R2.fastq.gz  | fastq     | 797320c0e44830e3264e0f816995d    | NextSeq500       | 78bp        |
| P9_small_Macrophages_R1.fastq.gz  | fastq     | 36e530a8836932c2a1988b9841       | NextSeq500       | 78bp        |
| P9_small_Macrophages_R2.fastq.gz  | fastq     | 51901e15c071101489f1d95188f      | NextSeq500       | 78bp        |
| P10_large_Macrophages_R1.fastq.gz | fastq     | 43c6147171bc01c747050e375        | NextSeq500       | 78bp        |
| P10_large_Macrophages_R2.fastq.gz | fastq     | 13735185c5c22f8a21544110468184   | NextSeq500       | 78bp        |
| P10_small_Macrophages_R1.fastq.gz | fastq     | 1e6d4c258f89203704569058f        | NextSeq500       | 78bp        |
| P10_small_Macrophages_R2.fastq.gz | fastq     | 7230b0895eacc24b16671c6819107d0c | NextSeq500       | 78bp        |
| P11_large_Macrophages_R1.fastq.gz | fastq     | 2624a72a4830c190080760f6a30c     | NextSeq500       | 78bp        |
| P11_large_Macrophages_R2.fastq.gz | fastq     | 49f4aa6893a3417a1064e29f4c2      | NextSeq500       | 78bp        |
| P11_small_Macrophages_R1.fastq.gz | fastq     | 86a07350c0d41b3070d51864470974   | NextSeq500       | 78bp        |
| P11_small_Macrophages_R2.fastq.gz | fastq     | 3881100c09c301018689a054c2b      | NextSeq500       | 78bp        |
| P12_large_Macrophages_R1.fastq.gz | fastq     | 7c7d831d8907e75d08a38922c06b     | NextSeq500       | 78bp        |
| P12_large_Macrophages_R2.fastq.gz | fastq     | 6a7b003a4c8d895385302c2298035    | NextSeq500       | 78bp        |
| P12_small_Macrophages_R1.fastq.gz | fastq     | 64ee2a26a745e98844200514618cf    | NextSeq500       | 78bp        |
| P12_small_Macrophages_R2.fastq.gz | fastq     | 2d47e20e3a7647d95aea7a2328a148f1 | NextSeq500       | 78bp        |

# For paired-end experiments, list the 2 associated raw files, and provide average insert size and standard deviation, if known. For SOLID experiments, list the 4 file names (include "file name 3" and "file name 4" columns).

| PAIRED-END EXPERIMENTS | file name 1                       | file name 2                       | average insert size | standard deviation |
|------------------------|-----------------------------------|-----------------------------------|---------------------|--------------------|
|                        | P8_large_Macrophages_R1.fastq.gz  | P8_large_Macrophages_R2.fastq.gz  | 44.78               | 57.69              |
|                        | P8_small_Macrophages_R1.fastq.gz  | P8_small_Macrophages_R2.fastq.gz  | 37.97               | 54.16              |
|                        | P9_large_Macrophages_R1.fastq.gz  | P9_large_Macrophages_R2.fastq.gz  | 41.64               | 57.82              |
|                        | P9_small_Macrophages_R1.fastq.gz  | P9_small_Macrophages_R2.fastq.gz  | 44.82               | 57.34              |
|                        | P10_large_Macrophages_R1.fastq.gz | P10_large_Macrophages_R2.fastq.gz | 45.14               | 56.32              |
|                        | P10_small_Macrophages_R1.fastq.gz | P10_small_Macrophages_R2.fastq.gz | 43.44               | 55.4               |
|                        | P11_large_Macrophages_R1.fastq.gz | P11_large_Macrophages_R2.fastq.gz | 39.12               | 55.39              |
|                        | P11_small_Macrophages_R1.fastq.gz | P11_small_Macrophages_R2.fastq.gz | 42.25               | 56.94              |
|                        | P12_large_Macrophages_R1.fastq.gz | P12_large_Macrophages_R2.fastq.gz | 47.45               | 57.45              |
|                        | P12_small_Macrophages_R1.fastq.gz | P12_small_Macrophages_R2.fastq.gz | 20.07               | 51.09              |
